# Supplementary material
Source: PubMed Central journal article supplement (PMC9212842)
Supplement: mmc2.pdf [file mmc2.pdf]

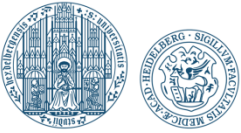

## Fragebogen für Patient:innen

Vorstudie zu LongCovidCare – Erhebung von Versorgungsbedarfen aus Sicht von Patient:innen und Hausärzt:innen zu Long-COVID  
Version 1.3

Sehr geehrte Dame, sehr geehrter Herr,

mit Hilfe dieses Fragebogens möchten wir gerne mehr über Ihre persönlichen Eindrücke und Erfahrungen bezüglich der Versorgungsangebote für Patient:innen mit einem Long-COVID-Syndrom erfahren. Hierzu gehören Symptome, die über vier Wochen nach Beginn einer akuten COVID-19-Erkrankung anhalten oder sich danach neu entwickeln und nicht durch eine andere Ursache erklärt sind (Definition nach den aktuellen NICE-Guidelines).

Sie können an der Studie teilnehmen, wenn Sie folgende Kriterien erfüllen:

- Mindestalter 18 Jahre
- Sie hatten eine COVID-19-Erkrankung, deren Symptombeginn mehr als vier Wochen zurückliegt.
- Die Sicherung der COVID-19-Erkrankung erfolgte durch einen positiven SARS-CoV-2-Abstrich (PCR-Testung).
- Sie haben Beschwerden, die im Rahmen der akuten COVID-19-Erkrankung oder danach neu auftraten, aktuell noch anhalten und nicht anderweitig erklärt sind
- Sie verfügen über gute Deutschkenntnisse.

Finanziert wird diese Studie durch das Ministerium für Wissenschaft, Forschung und Kunst, Baden-Württemberg. Für die Durchführung der Studie liegt ein positives Votum der Ethikkommission der Med. Fakultät Heidelberg vor. Die Erkenntnisse sollen in die Weiterentwicklung der Versorgungsangebote und -strukturen für Long-COVID-Patient:innen in der Region einfließen.

Bitte kreuzen Sie immer diejenige Antwortmöglichkeit an, die Ihnen spontan in den Sinn kommt. Sie können sich jederzeit entscheiden, einzelne Fragen im Fragebogen nicht zu beantworten. Bitte bedenken Sie jedoch, dass eine vollständige Beantwortung aller Fragen für die wissenschaftliche Auswertung von großer Bedeutung ist.

Die Angaben stehen ausschließlich den an der Studie beteiligten Studienmitarbeiter:innen zur Verfügung. Dritte werden keinen Einblick in die Studienunterlagen erhalten.

Bitte beachten Sie die Ausfüllhinweise im Online-Fragebogen.

**Vielen Dank für Ihre Teilnahme!**

### Teil 1 – Allgemeines

Bitte füllen Sie aus bzw. kreuzen Sie die Antwort an, die auf Sie zutrifft.

|                                                                                   |                                                                                                                                                                       |
|-----------------------------------------------------------------------------------|-----------------------------------------------------------------------------------------------------------------------------------------------------------------------|
| 1.1 Wie sind Sie auf die Studie aufmerksam geworden?<br>(Mehrfachauswahl möglich) | <input type="checkbox"/> Presse<br><input type="checkbox"/> Selbsthilfegruppe<br><input type="checkbox"/> Hausarztpraxis<br><input type="checkbox"/> Sonstiges: _____ |
|-----------------------------------------------------------------------------------|-----------------------------------------------------------------------------------------------------------------------------------------------------------------------|

### Teil 2 - Fragen zu Ihrer Krankheitsvorgeschichte

Bitte füllen Sie aus bzw. kreuzen Sie die Antwort an, die auf Sie zutrifft.

|                                                                                                                                                 |                                                                                                                                                                                                                             |
|-------------------------------------------------------------------------------------------------------------------------------------------------|-----------------------------------------------------------------------------------------------------------------------------------------------------------------------------------------------------------------------------|
| 2.1 Wie ist Ihre SARS-CoV-2-Infektion/ Ihre COVID-19-Erkrankung erkannt worden?                                                                 | <input type="checkbox"/> Es erfolgte eine Sicherung durch einen SARS-CoV-2-Abstrich (positive PCR-Testung).<br><input type="checkbox"/> Es erfolgte keine Sicherung durch einen SARS-CoV-2-Abstrich (positive PCR-Testung). |
| Wird bei 2.1 die Option „es erfolgte keine Sicherung“ angekreuzt, erfolgt der Studienausschluss, indem die weitere Befragung nicht möglich ist. |                                                                                                                                                                                                                             |
| 2.2 Die SARS-CoV-2-Infektion/ COVID-19-Erkrankung begann im                                                                                     | Monat  __ __       Jahr  __ __ __ __ <br>(z.B. 03 für März)                      (z.B. 2020)                                                                                                                                |
| 2.3 Wie stark ausgeprägt waren Ihre Symptome während Ihrer SARS-CoV-2-Infektion/ Ihrer COVID-19-Erkrankung?                                     | <input type="checkbox"/> keine Symptome<br><input type="checkbox"/> leichte Symptome<br><input type="checkbox"/> starke Symptome - ambulante Behandlung<br><input type="checkbox"/> starke Symptome - Krankenhausbehandlung |

### Teil 3 - Fragen zu aktuellen Symptomen

Bitte füllen Sie aus bzw. kreuzen Sie die Antwort an, die auf Sie zutrifft.

| In den weiteren Fragen werden Symptome, die Sie auf Ihre zurückliegende COVID-19-Erkrankung zurückführen, mit „Long-COVID-Symptomen“ bezeichnet. |                                                                                                                                                                                                                                                                                                                                                                                                               |
|--------------------------------------------------------------------------------------------------------------------------------------------------|---------------------------------------------------------------------------------------------------------------------------------------------------------------------------------------------------------------------------------------------------------------------------------------------------------------------------------------------------------------------------------------------------------------|
| 3.1 Wie stark fühlen Sie sich derzeit durch Long-COVID-Symptome eingeschränkt?                                                                   | <p>Gar nicht <span style="float: right;">sehr stark</span></p> <p> <input type="checkbox"/> 0   <input type="checkbox"/> 1   <input type="checkbox"/> 2   <input type="checkbox"/> 3   <input type="checkbox"/> 4   <input type="checkbox"/> 5   <input type="checkbox"/> 6   <input type="checkbox"/> 7   <input type="checkbox"/> 8   <input type="checkbox"/> 9   <input type="checkbox"/> 10         </p> |
| 3.2 Wie stark fühlen Sie sich derzeit durch Long-COVID-Symptome verunsichert?                                                                    | <p>Gar nicht <span style="float: right;">sehr stark</span></p> <p> <input type="checkbox"/> 0   <input type="checkbox"/> 1   <input type="checkbox"/> 2   <input type="checkbox"/> 3   <input type="checkbox"/> 4   <input type="checkbox"/> 5   <input type="checkbox"/> 6   <input type="checkbox"/> 7   <input type="checkbox"/> 8   <input type="checkbox"/> 9   <input type="checkbox"/> 10         </p> |
| 3.3 Haben Sie wegen Long-COVID-Symptomen ärztliche Hilfe aufgesucht?                                                                             | <p><input type="checkbox"/> nein</p> <p><input type="checkbox"/> ja, folgende: _____</p> <p>_____</p>                                                                                                                                                                                                                                                                                                         |
| 3.4 Haben Sie wegen Long-COVID-Symptomen andere Hilfe gesucht?                                                                                   | <p><input type="checkbox"/> nein</p> <p><input type="checkbox"/> ja, folgende: _____</p> <p>_____</p>                                                                                                                                                                                                                                                                                                         |

## Teil 4 - Fragen zu Ihrer Zufriedenheit mit der medizinischen Versorgung

Bitte füllen Sie aus bzw. kreuzen Sie die Antwort an, die auf Sie zutrifft.

| Bei der medizinischen Versorgung meiner Long-COVID-Symptome                                                                   |                               |                               |                               |                               |                               |                          |
|-------------------------------------------------------------------------------------------------------------------------------|-------------------------------|-------------------------------|-------------------------------|-------------------------------|-------------------------------|--------------------------|
|                                                                                                                               | Trifft nicht zu               |                               |                               |                               | Trifft zu                     | Keine Angabe             |
| 4.1 ist mein Hausarzt/ meine Hausärztin erster Ansprechpartner/ erste Ansprechpartnerin.                                      | <input type="checkbox"/><br>1 | <input type="checkbox"/><br>2 | <input type="checkbox"/><br>3 | <input type="checkbox"/><br>4 | <input type="checkbox"/><br>5 | <input type="checkbox"/> |
| 4.2 fühle ich mich mit meinen Beschwerden ernst genommen.                                                                     | <input type="checkbox"/><br>1 | <input type="checkbox"/><br>2 | <input type="checkbox"/><br>3 | <input type="checkbox"/><br>4 | <input type="checkbox"/><br>5 | <input type="checkbox"/> |
| 4.3 werden meine Vorstellungen in die Entscheidung zur weiteren medizinischen Versorgung mit einbezogen.                      | <input type="checkbox"/><br>1 | <input type="checkbox"/><br>2 | <input type="checkbox"/><br>3 | <input type="checkbox"/><br>4 | <input type="checkbox"/><br>5 | <input type="checkbox"/> |
| 4.4 werde ich dazu ermuntert, aktiv an meinem Behandlungsplan mitzuwirken.                                                    | <input type="checkbox"/><br>1 | <input type="checkbox"/><br>2 | <input type="checkbox"/><br>3 | <input type="checkbox"/><br>4 | <input type="checkbox"/><br>5 | <input type="checkbox"/> |
| 4.5 erhalte ich schriftliche Handlungsempfehlungen, die mich bei der Krankheitsbewältigung unterstützen.                      | <input type="checkbox"/><br>1 | <input type="checkbox"/><br>2 | <input type="checkbox"/><br>3 | <input type="checkbox"/><br>4 | <input type="checkbox"/><br>5 | <input type="checkbox"/> |
| 4.6 erhalte ich Empfehlungen zur körperlichen Aktivität.                                                                      | <input type="checkbox"/><br>1 | <input type="checkbox"/><br>2 | <input type="checkbox"/><br>3 | <input type="checkbox"/><br>4 | <input type="checkbox"/><br>5 | <input type="checkbox"/> |
| 4.7 bin ich mit dem Umfang der durchgeführten Untersuchungen zufrieden.                                                       | <input type="checkbox"/><br>1 | <input type="checkbox"/><br>2 | <input type="checkbox"/><br>3 | <input type="checkbox"/><br>4 | <input type="checkbox"/><br>5 | <input type="checkbox"/> |
| 4.8 bin ich mit der Veranlassung von Überweisungen zu weiteren Untersuchungen zufrieden.                                      | <input type="checkbox"/><br>1 | <input type="checkbox"/><br>2 | <input type="checkbox"/><br>3 | <input type="checkbox"/><br>4 | <input type="checkbox"/><br>5 | <input type="checkbox"/> |
| 4.9 bin ich mit der Veranlassung von therapeutischen Maßnahmen (z.B. Atemtherapie, Physiotherapie, Rehabilitation) zufrieden. | <input type="checkbox"/><br>1 | <input type="checkbox"/><br>2 | <input type="checkbox"/><br>3 | <input type="checkbox"/><br>4 | <input type="checkbox"/><br>5 | <input type="checkbox"/> |
| 4.10 werde ich auf Angebote der Selbsthilfe aufmerksam gemacht.                                                               | <input type="checkbox"/><br>1 | <input type="checkbox"/><br>2 | <input type="checkbox"/><br>3 | <input type="checkbox"/><br>4 | <input type="checkbox"/><br>5 | <input type="checkbox"/> |
| 4.11 übernimmt mein Hausarzt/ meine Hausärztin die Organisation der Gesamtbehandlung.                                         | <input type="checkbox"/><br>1 | <input type="checkbox"/><br>2 | <input type="checkbox"/><br>3 | <input type="checkbox"/><br>4 | <input type="checkbox"/><br>5 | <input type="checkbox"/> |
| 4.12 kann ich durch Überweisung empfohlene Arzttermine gut umsetzen.                                                          | <input type="checkbox"/><br>1 | <input type="checkbox"/><br>2 | <input type="checkbox"/><br>3 | <input type="checkbox"/><br>4 | <input type="checkbox"/><br>5 | <input type="checkbox"/> |
| 4.13 bin ich mit dem Informationsaustausch zwischen den behandelnden Ärzt:innen zufrieden.                                    | <input type="checkbox"/><br>1 | <input type="checkbox"/><br>2 | <input type="checkbox"/><br>3 | <input type="checkbox"/><br>4 | <input type="checkbox"/><br>5 | <input type="checkbox"/> |
| 4.14 bin ich mit dem Wissensstand der behandelnden Ärzt:innen zufrieden.                                                      | <input type="checkbox"/><br>1 | <input type="checkbox"/><br>2 | <input type="checkbox"/><br>3 | <input type="checkbox"/><br>4 | <input type="checkbox"/><br>5 | <input type="checkbox"/> |
| 4.15 tragen meine Erfahrungen zum allgemeinen <u>zum Wissenszuwachs zum Thema Long-COVID</u> bei.                             | <input type="checkbox"/><br>1 | <input type="checkbox"/><br>2 | <input type="checkbox"/><br>3 | <input type="checkbox"/><br>4 | <input type="checkbox"/><br>5 | <input type="checkbox"/> |
| 4.16 bin ich mit dem Versorgungsangebot in der Region insgesamt zufrieden.                                                    | <input type="checkbox"/><br>1 | <input type="checkbox"/><br>2 | <input type="checkbox"/><br>3 | <input type="checkbox"/><br>4 | <input type="checkbox"/><br>5 | <input type="checkbox"/> |

**Teil 5 – Welche Erfahrungen haben Sie in Bezug auf die medizinische Versorgung Ihrer Long-COVID-Symptome gemacht?**

**Teil 6 – Welche Ideen und Wünsche haben Sie zur Weiterentwicklung der medizinischen Versorgung von Patient:innen mit Long-COVID-Symptomen?**

### Teil 7 - Fragen zu Ihrer Person

Bitte füllen Sie aus bzw. kreuzen Sie die Antwort an, die auf Sie zutrifft.

|                                                                                                            |                                                                                                                                                                                                                                                                                                                                                                                                               |                                   |                                 |
|------------------------------------------------------------------------------------------------------------|---------------------------------------------------------------------------------------------------------------------------------------------------------------------------------------------------------------------------------------------------------------------------------------------------------------------------------------------------------------------------------------------------------------|-----------------------------------|---------------------------------|
| 7.1 Ihr Land-/Stadtkreis?                                                                                  |                                                                                                                                                                                                                                                                                                                                                                                                               |                                   |                                 |
| 7.2 Ihr Geburtsjahr?                                                                                       | _ _ _ _                                                                                                                                                                                                                                                                                                                                                                                                       |                                   |                                 |
| 7.3 Ihr Geschlecht?                                                                                        | <input type="checkbox"/> Weiblich                                                                                                                                                                                                                                                                                                                                                                             | <input type="checkbox"/> Männlich | <input type="checkbox"/> Divers |
| 7.4 Haben Sie einen Hausarzt/<br>eine Hausärztin?                                                          | <input type="checkbox"/> nein                                                                                                                                                                                                                                                                                                                                                                                 |                                   | <input type="checkbox"/> ja     |
| Wenn Sie 7.4 mit „ja“ beantwortet haben, fahren Sie bitte mit 7.4a fort. Ansonsten gehen Sie weiter zu 7.5 |                                                                                                                                                                                                                                                                                                                                                                                                               |                                   |                                 |
| 7.4a Wie lange sind schon in<br>medizinischer Behandlung bei<br>Ihrem Hausarzt/ Ihrer Haus-<br>ärztin?     | _ _ _  Jahre                                                                                                                                                                                                                                                                                                                                                                                                  |                                   |                                 |
| 7.5 Welche Erwerbssituation<br>trifft auf Sie zu?                                                          | <input type="checkbox"/> Vollzeit erwerbstätig (35 Stunden pro Woche und mehr)<br><input type="checkbox"/> Teilzeit erwerbstätig (unter 35 Stunden pro Woche)<br><input type="checkbox"/> Nicht erwerbstätig (Rentner, Studierende, Arbeitslose)<br><input type="checkbox"/> Mutterschutz / Elternzeit<br><input type="checkbox"/> berufliche Ausbildung<br><input type="checkbox"/> sonstige, und zwar _____ |                                   |                                 |
| 7.6 Sind Sie derzeit wegen<br>Long-COVID-Symptomen<br>krankgeschrieben?                                    | <input type="checkbox"/> nein                                                                                                                                                                                                                                                                                                                                                                                 |                                   | <input type="checkbox"/> ja     |

### Teil 8 - Gibt es noch etwas, was Sie in Bezug auf Ihre Wahrnehmung und Erfahrung zum Thema Long-COVID hinzufügen möchten?

**Vielen Dank für Ihre Teilnahme!**

**Studienleitung**

Seite 6 von 5

Prof. Dr. med. Joachim Szecsenyi | Abteilung Allgemeinmedizin und Versorgungsforschung  
Prof. (apl.) Dr. med. Uta Merle | Med. Klinik, Abt. Innere Medizin IV / Long-COVID-Ambulanz  
Universitätsklinikum Heidelberg, Im Neuenheimer Feld, 69120 Heidelberg

Bei Fragen wenden Sie sich bitte an das Studienteam. Kontakt: Interne Projektkoordination Dr. med. Sandra Stengel  
Tel.: 06221 - 56-32606 | E-Mail: [longcovid.AMED@med.uni-heidelberg.de](mailto:longcovid.AMED@med.uni-heidelberg.de)

**Weitere Informationen zum Projekt finden Sie unter [www.longcovidnetz.de](http://www.longcovidnetz.de)**
