# Supplementary material
Source: PubMed Central journal article supplement (PMC9212842)
Supplement: mmc3.pdf [file mmc3.pdf]

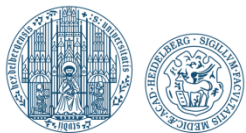

## Fragebogen für Hausärzt:innen

Vorstudie zu LongCovidCare – Erhebung von Versorgungsbedarfen aus Sicht von Patient:innen und Hausärzt:innen zu Long-COVID

Version 1.3

Sehr geehrte Frau Kollegin, sehr geehrter Herr Kollege,

mit Hilfe dieses Fragebogens möchten wir gerne mehr über Ihre persönlichen Eindrücke und Erfahrungen bezüglich der Versorgungsmöglichkeiten für Patient:innen mit Long-COVID-Syndrom erfahren. Unter einem Long-COVID-Syndrom werden klinische Zeichen und Symptome zusammengefasst, die über vier Wochen nach einer akuten COVID-19-Erkrankung anhalten oder sich neu entwickeln und nicht durch eine andere Ursache erklärt sind (Definition nach den aktuellen NICE-Guidelines).

Finanziert wird diese Studie durch das Ministerium für Wissenschaft, Forschung und Kunst, Baden-Württemberg. Für die Durchführung der Studie liegt ein positives Votum der Ethikkommission der Med. Fakultät Heidelberg vor. Die Erkenntnisse sollen in die Weiterentwicklung der Versorgungsangebote und -strukturen für Long-COVID-Patient:innen in der Region einfließen.

Bitte kreuzen Sie immer diejenige Antwortmöglichkeit an, die Ihnen spontan in den Sinn kommt. Sie können sich jederzeit entscheiden, einzelne Fragen im Fragebogen nicht zu beantworten. Bitte bedenken Sie jedoch, dass eine vollständige Beantwortung aller Fragen für die wissenschaftliche Auswertung von großer Bedeutung ist.

Die Angaben stehen ausschließlich den Studienmitarbeiter:innen zur Verfügung. Dritte werden keinen Einblick in die Studienunterlagen erhalten.

Bitte beachten Sie beim Ausfüllen folgende Hinweise:

- Verwenden Sie bitte nur Kugelschreiber.
- Bitte geben Sie Freitextangaben in Druckbuchstaben an.
- Kreuzen Sie die Kästchen deutlich an:
- Bei versehentlicher Falschwahl füllen Sie bitte das entsprechende Kästchen ganz aus  und kreuzen Ihre Auswahl erneut an:

**Bitte stecken Sie den ausgefüllten Fragebogen in den beiliegenden, vorfrankierten Rücksendeumschlag und verschließen diesen. Den verschlossenen Rücksendeumschlag versenden Sie bitte auf dem Postweg.**

**Vielen Dank für Ihre Teilnahme!**

## Teil 1 - Fragen zu Beratungsanlässen

Bitte füllen Sie aus bzw. kreuzen Sie die Antwort an, die auf Sie zutrifft.

|                                                                                                                                                                                        |                                |                                 |
|----------------------------------------------------------------------------------------------------------------------------------------------------------------------------------------|--------------------------------|---------------------------------|
| Wie viele Patient:innen behandeln Sie derzeit insgesamt bzw. haben Sie insgesamt behandelt, bei denen Sie den Verdacht oder die gesicherte Diagnose eines Long-COVID-Syndroms stellen? | <input type="checkbox"/> 0     | <input type="checkbox"/> 6 - 25 |
|                                                                                                                                                                                        | <input type="checkbox"/> 1 - 5 | <input type="checkbox"/> > 25   |
| Wie viele Patient:innen haben Sie bislang an eine Long-COVID-Ambulanz überwiesen?                                                                                                      | <input type="checkbox"/> 0     | <input type="checkbox"/> 6 - 25 |
|                                                                                                                                                                                        | <input type="checkbox"/> 1 - 5 | <input type="checkbox"/> > 25   |

## Teil 2 - Fragen zur hausärztlichen Versorgung von Patient:innen mit Long-COVID-Symptomen

Bitte füllen Sie aus bzw. kreuzen Sie die Antwort an, die auf Sie zutrifft.

| <b>Bei der hausärztlichen Versorgung von Long-COVID-Symptomen,</b>                                                               |                               |                               |                               |                               |                               |                          |
|----------------------------------------------------------------------------------------------------------------------------------|-------------------------------|-------------------------------|-------------------------------|-------------------------------|-------------------------------|--------------------------|
|                                                                                                                                  | Trifft nicht zu               |                               | Trifft zu                     |                               |                               | Keine Angabe             |
| ... bin ich als Hausarzt/ Hausärztin erster Ansprechpartner/ erste Ansprechpartnerin.                                            | <input type="checkbox"/><br>1 | <input type="checkbox"/><br>2 | <input type="checkbox"/><br>3 | <input type="checkbox"/><br>4 | <input type="checkbox"/><br>5 | <input type="checkbox"/> |
| ... führe ich die geschilderten Beschwerden tatsächlich auf eine zurückliegende COVID-19-Erkrankung zurück.                      | <input type="checkbox"/><br>1 | <input type="checkbox"/><br>2 | <input type="checkbox"/><br>3 | <input type="checkbox"/><br>4 | <input type="checkbox"/><br>5 | <input type="checkbox"/> |
| ... beziehe ich die Vorstellungen meiner Patient:innen in die Entscheidung der weiteren medizinischen Versorgung mit ein.        | <input type="checkbox"/><br>1 | <input type="checkbox"/><br>2 | <input type="checkbox"/><br>3 | <input type="checkbox"/><br>4 | <input type="checkbox"/><br>5 | <input type="checkbox"/> |
| ... ermuntere ich Patient:innen, aktiv an einem Behandlungsplan mitzuwirken.                                                     | <input type="checkbox"/><br>1 | <input type="checkbox"/><br>2 | <input type="checkbox"/><br>3 | <input type="checkbox"/><br>4 | <input type="checkbox"/><br>5 | <input type="checkbox"/> |
| ... verwende ich schriftliche Handlungsempfehlungen zur Unterstützung der Patient:innen bei der Krankheitsbewältigung.           | <input type="checkbox"/><br>1 | <input type="checkbox"/><br>2 | <input type="checkbox"/><br>3 | <input type="checkbox"/><br>4 | <input type="checkbox"/><br>5 | <input type="checkbox"/> |
| ... fühle ich mich sicher in Bezug auf Empfehlungen zur körperlichen Aktivität.                                                  | <input type="checkbox"/><br>1 | <input type="checkbox"/><br>2 | <input type="checkbox"/><br>3 | <input type="checkbox"/><br>4 | <input type="checkbox"/><br>5 | <input type="checkbox"/> |
| ... fühle ich mich sicher bei der Auswahl von mir durchzuführender Untersuchungen.                                               | <input type="checkbox"/><br>1 | <input type="checkbox"/><br>2 | <input type="checkbox"/><br>3 | <input type="checkbox"/><br>4 | <input type="checkbox"/><br>5 | <input type="checkbox"/> |
| ... fühle ich mich sicher in Bezug auf die von mir zu veranlassenden Überweisungen zu weiteren Untersuchungen.                   | <input type="checkbox"/><br>1 | <input type="checkbox"/><br>2 | <input type="checkbox"/><br>3 | <input type="checkbox"/><br>4 | <input type="checkbox"/><br>5 | <input type="checkbox"/> |
| ... fühle ich mich sicher in der Veranlassung von therapeutischen Maßnahmen (z.B. Atemtherapie, Physiotherapie, Rehabilitation). | <input type="checkbox"/><br>1 | <input type="checkbox"/><br>2 | <input type="checkbox"/><br>3 | <input type="checkbox"/><br>4 | <input type="checkbox"/><br>5 | <input type="checkbox"/> |
| ... mache ich auf Angebote der Selbsthilfe aufmerksam.                                                                           | <input type="checkbox"/><br>1 | <input type="checkbox"/><br>2 | <input type="checkbox"/><br>3 | <input type="checkbox"/><br>4 | <input type="checkbox"/><br>5 | <input type="checkbox"/> |
| ... übernehme ich als Hausarzt/ Hausärztin die Organisation der Gesamtbehandlung.                                                | <input type="checkbox"/><br>1 | <input type="checkbox"/><br>2 | <input type="checkbox"/><br>3 | <input type="checkbox"/><br>4 | <input type="checkbox"/><br>5 | <input type="checkbox"/> |

| Bei der hausärztlichen Versorgung von Long-COVID-Symptomen,                                                |                               |                               |                               |                               |                               |                          |
|------------------------------------------------------------------------------------------------------------|-------------------------------|-------------------------------|-------------------------------|-------------------------------|-------------------------------|--------------------------|
|                                                                                                            | Trifft nicht zu               |                               |                               | Trifft zu                     |                               | Keine Angabe             |
| ... lassen sich Überweisungen zu anderen Leistungserbringern gut umsetzen.                                 | <input type="checkbox"/><br>1 | <input type="checkbox"/><br>2 | <input type="checkbox"/><br>3 | <input type="checkbox"/><br>4 | <input type="checkbox"/><br>5 | <input type="checkbox"/> |
| ... bin ich mit dem Informationsaustausch zwischen den weiteren behandelnden Ärzt:innen und mir zufrieden. | <input type="checkbox"/><br>1 | <input type="checkbox"/><br>2 | <input type="checkbox"/><br>3 | <input type="checkbox"/><br>4 | <input type="checkbox"/><br>5 | <input type="checkbox"/> |
| ... bin ich mit meinem Wissensstand zufrieden.                                                             | <input type="checkbox"/><br>1 | <input type="checkbox"/><br>2 | <input type="checkbox"/><br>3 | <input type="checkbox"/><br>4 | <input type="checkbox"/><br>5 | <input type="checkbox"/> |
| ... tragen meine Erfahrungen zum allgemeinen Wissenszuwachs bzgl. Long-COVID bei.                          | <input type="checkbox"/><br>1 | <input type="checkbox"/><br>2 | <input type="checkbox"/><br>3 | <input type="checkbox"/><br>4 | <input type="checkbox"/><br>5 | <input type="checkbox"/> |
| ... bin ich mit dem Versorgungsangebot in der Region insgesamt zufrieden.                                  | <input type="checkbox"/><br>1 | <input type="checkbox"/><br>2 | <input type="checkbox"/><br>3 | <input type="checkbox"/><br>4 | <input type="checkbox"/><br>5 | <input type="checkbox"/> |

**Teil 3 – Welche Herausforderungen erleben Sie mit Blick auf die Versorgung von Patient:innen mit Long-COVID-Symptomen?**

**Teil 4 – Welche Ideen oder Wünsche zur Weiterentwicklung der Versorgung von Patient:innen mit Long-COVID-Symptomen haben Sie?**

**Teil 5 - Fragen zu Ihrer Person**

Bitte füllen Sie aus bzw. kreuzen Sie die Antwort an, die auf Sie zutrifft.

|                                                     |                                                                                                                                                                                             |
|-----------------------------------------------------|---------------------------------------------------------------------------------------------------------------------------------------------------------------------------------------------|
| Ihr Geburtsjahr?                                    | __ __ __ __  (bitte tragen Sie die Jahreszahl ein)                                                                                                                                          |
| Ihr Geschlecht?                                     | <input type="checkbox"/> Weiblich <input type="checkbox"/> Männlich <input type="checkbox"/> Divers                                                                                         |
| Unter welcher Fachbezeichnung sind Sie tätig?       | <input type="checkbox"/> Facharzt/ Fachärztin für Allgemeinmedizin<br><input type="checkbox"/> Hausärztlich tätiger Internist/ tätige Internistin<br><input type="checkbox"/> Andere: _____ |
| Seit wie vielen Jahren sind Sie hausärztlich tätig? | __ __  Jahr(e)                                                                                                                                                                              |
| Wo liegt Ihre Praxis?                               | <input type="checkbox"/> Stadtzentrum <input type="checkbox"/> Ländliches Gebiet<br><input type="checkbox"/> Stadt-Umkreis 20 km                                                            |

|                                                                               |                                                                                                                                                                                                                                                       |
|-------------------------------------------------------------------------------|-------------------------------------------------------------------------------------------------------------------------------------------------------------------------------------------------------------------------------------------------------|
| In welcher Praxisform arbeiten Sie?                                           | <input type="checkbox"/> Einzelpraxis <input type="checkbox"/> Praxisgemeinschaft<br><input type="checkbox"/> Berufsausübungsgemein. <input type="checkbox"/> MVZ                                                                                     |
| Wie hoch ist Ihre durchschnittliche Wochenarbeitszeit?                        | __ __  Stunden                                                                                                                                                                                                                                        |
| Wie hoch ist Ihre durchschnittliche Scheinzahl pro Quartal?                   | <input type="checkbox"/> < 500 Scheine <input type="checkbox"/> 500-1000 Scheine<br><input type="checkbox"/> 1001-1500 Scheine <input type="checkbox"/> > 1500 Scheine                                                                                |
| Wie viele Personen arbeiten außer Ihnen in Ihrer Praxis?                      | __ __  ärztliche Kolleg:innen<br> __ __  nichtärztliche Praxismitarbeiter:innen                                                                                                                                                                       |
| Nehmen Sie an der hausarztzentrierten Versorgung teil?                        | <input type="checkbox"/> nein <input type="checkbox"/> ja                                                                                                                                                                                             |
| An folgender Veranstaltung habe ich teilgenommen<br>(Mehrfachauswahl möglich) | Web-Informationsveranstaltung und Austausch an den Schnittstellen der med. Versorgung in der COVID-19-Pandemie im Rhein-Neckar-Kreis<br><input type="checkbox"/> 2. Veranstaltung - 22.01.2021 <input type="checkbox"/> 3. Veranstaltung - 19.03.2021 |
|                                                                               | <input type="checkbox"/> an keiner von beiden                                                                                                                                                                                                         |

**Teil 6 - Gibt es noch etwas, was Sie in Bezug auf Ihre Wahrnehmung und Erfahrung zum Thema Long-COVID hinzufügen möchten?**

**Vielen Dank für Ihre Teilnahme!**

**Studienleitung**

Prof. Dr. med. Joachim Szecsenyi | Abteilung Allgemeinmedizin und Versorgungsforschung  
 Prof. (apl.) Dr. med. Uta Merle | Med. Klinik, Abt. Innere Medizin IV / Long-COVID-Ambulanz  
 Universitätsklinikum Heidelberg, Im Neuenheimer Feld, 69120 Heidelberg

Bei Fragen wenden Sie sich bitte an das Studienteam. Kontakt: Interne Projektkoordination Dr. med. Sandra Stengel  
 Tel.: 06221 - 56-32606 | E-Mail: [longcovid.AMED@med.uni-heidelberg.de](mailto:longcovid.AMED@med.uni-heidelberg.de)

Weitere Informationen zum Projekt finden Sie unter [www.longcovidnetz.de](http://www.longcovidnetz.de)
